# Supplementary material
Source: PubMed Central journal article supplement (PMC2689513)
Supplement: NIHMS4848-supplement-supmat.pdf [file NIHMS4848-supplement-supmat.pdf]

## SUPPLEMENTARY MATERIAL

### SUPPLEMENTARY MATERIAL TABLE LEGENDS

#### Table A: Demographic and anatomical details of the 74 selected subjects

Handedness was assessed using the Edinburgh questionnaire (Oldfield, 1971). In each male/female group, data was sorted according to handedness. See text for anatomical measurements. Legend: CC: midsaggital surface area of the whole Corpus Callosum, F: females, FLI: hemispheric Functional Lateralization Index based on Nagata's method (see text), HoI, II, III, IV and V: midsaggital surface area of the different portions of the CC according to Hofer et al, 2006 (see text), M: males, SD: standard deviation, WM: whole white matter hemispheric volumes.

#### Table B: Anatomical results

a. results of multiple regressions using the Edinburgh handedness score, gender, age and hemispheric white matter volume (WM) as regressors on the surface area of either the whole CC, Hofer I, II, III, IV or V as the dependent variable. b. partial correlations between different subdivisions of the CC according to Hofer's scheme (Hofer et al. 2006) and controlling for whole white matter volume. \*:  $p \leq 0.05$ , \*\*:  $p < 0.01$ , \*\*\*:  $p < 0.001$ .

### SUPPLEMENTARY MATERIAL TABLES

#### Table A: Demographic and anatomical details of the 74 selected subjects

| Subject | Gender | Edin. | Age | HoI                   | HoII | HoIII | HoIV | HoV | CC        | WM  | FLI   |
|---------|--------|-------|-----|-----------------------|------|-------|------|-----|-----------|-----|-------|
|         |        |       |     | <i>mm<sup>2</sup></i> |      |       |      |     | <i>ml</i> |     |       |
| 1       | M      | -100  | 37  | 183                   | 167  | 50    | 31   | 240 | 671       | 365 | -0.31 |
| 2       |        | -100  | 43  | 189                   | 169  | 58    | 40   | 221 | 677       | 528 | -0.29 |
| 3       |        | -100  | 57  | 186                   | 156  | 81    | 30   | 179 | 633       | 444 | -0.06 |
| 4       |        | -100  | 50  | 214                   | 173  | 71    | 32   | 185 | 674       | 479 | -0.65 |
| 5       |        | -89   | 32  | 223                   | 193  | 83    | 50   | 243 | 792       | 508 | -0.80 |
| 6       |        | -86   | 20  | 167                   | 154  | 61    | 28   | 156 | 566       | 453 | -0.18 |
| 7       |        | -67   | 33  | 152                   | 151  | 53    | 28   | 187 | 570       | 393 | -0.59 |
| 8       |        | -60   | 27  | 161                   | 144  | 57    | 31   | 194 | 587       | 357 | -0.16 |
| 9       |        | -60   | 50  | 206                   | 151  | 71    | 28   | 272 | 728       | 438 | -0.39 |
| 10      |        | -54   | 33  | 172                   | 163  | 64    | 24   | 231 | 654       | 475 | -0.47 |
| 11      |        | -50   | 24  | 171                   | 151  | 61    | 19   | 185 | 587       | 404 | -0.39 |
| 12      |        | -47   | 25  | 238                   | 183  | 73    | 39   | 247 | 780       | 468 | -0.63 |
| 13      |        | -45   | 28  | 230                   | 190  | 54    | 25   | 188 | 687       | 431 | -0.58 |
| 14      |        | -23   | 46  | 184                   | 183  | 78    | 37   | 274 | 756       | 517 | -0.14 |
| 15      |        | -16   | 38  | 199                   | 170  | 69    | 32   | 241 | 712       | 425 | -0.38 |
| 16      |        | 26    | 57  | 171                   | 126  | 48    | 23   | 204 | 572       | 427 | -0.49 |
| 17      |        | 33    | 25  | 143                   | 136  | 57    | 21   | 193 | 551       | 441 | -0.47 |
| 18      |        | 53    | 17  | 105                   | 105  | 55    | 25   | 158 | 447       | 418 | -0.82 |
| 19      |        | 53    | 17  | 131                   | 131  | 60    | 34   | 133 | 488       | 484 | -0.66 |
| 20      |        | 54    | 17  | 152                   | 152  | 63    | 63   | 172 | 603       | 476 | -0.33 |

|              |          |      |      |       |       |       |      |      |       |      |        |
|--------------|----------|------|------|-------|-------|-------|------|------|-------|------|--------|
| 21           |          | 60   | 17   | 135   | 135   | 61    | 33   | 173  | 536   | 395  | -0.44  |
| 22           |          | 71   | 20   | 139   | 139   | 72    | 30   | 177  | 556   | 366  | -0.66  |
| 23           |          | 71   | 17   | 140   | 140   | 65    | 24   | 239  | 607   | 478  | -0.50  |
| 24           |          | 71   | 17   | 116   | 116   | 53    | 27   | 208  | 520   | 450  | -0.65  |
| 25           |          | 71   | 18   | 169   | 157   | 65    | 36   | 186  | 613   | 459  | -0.60  |
| 26           |          | 80   | 18   | 121   | 121   | 55    | 25   | 169  | 492   | 408  | -0.73  |
| 27           |          | 82   | 48   | 129   | 111   | 51    | 23   | 160  | 474   | 399  | -0.56  |
| 28           |          | 89   | 17   | 121   | 121   | 54    | 41   | 179  | 517   | 435  | -0.19  |
| 29           |          | 100  | 17   | 163   | 163   | 67    | 21   | 205  | 620   | 436  | -0.61  |
| 30           |          | 100  | 17   | 125   | 125   | 50    | 22   | 168  | 490   | 403  | -0.80  |
| 31           |          | 100  | 69   | 133   | 113   | 44    | 25   | 185  | 500   | 388  | -0.80  |
| 32           |          | 100  | 27   | 182   | 166   | 67    | 28   | 248  | 691   | 425  | -0.55  |
| 33           |          | 100  | 26   | 216   | 171   | 88    | 42   | 224  | 740   | 472  | -0.91  |
| 34           |          | 100  | 51   | 176   | 147   | 52    | 18   | 207  | 602   | 472  | -0.44  |
| 35           |          | 100  | 28   | 191   | 167   | 69    | 26   | 207  | 660   | 461  | -0.30  |
| 36           |          | 100  | 21   | 206   | 155   | 56    | 28   | 217  | 662   | 487  | -0.70  |
| 37           |          | 100  | 25   | 199   | 166   | 50    | 31   | 188  | 634   | 476  | -0.32  |
| <b>All M</b> |          | 19   | 31   | 169   | 150   | 62    | 30   | 201  | 612   | 442  | -0.5   |
|              |          | (76) | (14) | (451) | (175) | (114) | (52) | (45) | (167) | (42) | (0.21) |
| 38           | <b>F</b> | -100 | 25   | 139   | 130   | 52    | 23   | 189  | 532   | 430  | -0.34  |
| 39           |          | -100 | 23   | 205   | 209   | 85    | 44   | 286  | 828   | 535  | -0.36  |
| 40           |          | -100 | 26   | 199   | 177   | 61    | 36   | 225  | 698   | 377  | -0.28  |
| 41           |          | -88  | 20   | 166   | 141   | 47    | 30   | 204  | 588   | 387  | -0.21  |
| 42           |          | -44  | 37   | 165   | 130   | 57    | 21   | 176  | 549   | 360  | -0.81  |
| 43           |          | -33  | 23   | 132   | 108   | 48    | 23   | 156  | 467   | 368  | -0.75  |
| 44           |          | -29  | 35   | 117   | 100   | 49    | 19   | 162  | 447   | 423  | -0.64  |
| 45           |          | -11  | 70   | 111   | 105   | 42    | 21   | 167  | 446   | 333  | -0.34  |
| 46           |          | -10  | 24   | 153   | 129   | 53    | 26   | 232  | 593   | 400  | -0.79  |
| 47           |          | -7   | 27   | 163   | 128   | 55    | 16   | 173  | 534   | 359  | -0.50  |
| 48           |          | -5   | 25   | 106   | 119   | 44    | 18   | 183  | 470   | 318  | -0.43  |
| 49           |          | 50   | 50   | 177   | 172   | 91    | 33   | 222  | 694   | 384  | -0.46  |
| 50           |          | 50   | 17   | 155   | 155   | 51    | 28   | 169  | 558   | 417  | -0.19  |
| 51           |          | 50   | 27   | 175   | 140   | 58    | 34   | 242  | 649   | 373  | -0.27  |
| 52           |          | 60   | 50   | 163   | 141   | 68    | 31   | 201  | 605   | 431  | -0.31  |
| 53           |          | 71   | 17   | 177   | 177   | 67    | 31   | 196  | 648   | 380  | -0.72  |
| 54           |          | 80   | 34   | 173   | 122   | 58    | 24   | 207  | 584   | 399  | -0.31  |
| 55           |          | 85   | 18   | 115   | 115   | 50    | 28   | 152  | 460   | 369  | -0.13  |
| 56           |          | 87   | 17   | 140   | 140   | 62    | 29   | 142  | 513   | 421  | -0.16  |
| 57           |          | 88   | 29   | 219   | 194   | 87    | 35   | 256  | 791   | 418  | -0.31  |
| 58           |          | 89   | 58   | 167   | 133   | 53    | 24   | 207  | 585   | 387  | -0.52  |
| 59           |          | 90   | 26   | 158   | 140   | 63    | 30   | 168  | 558   | 300  | -0.41  |
| 60           |          | 90   | 21   | 139   | 152   | 59    | 32   | 215  | 597   | 354  | -0.60  |
| 61           |          | 90   | 73   | 118   | 109   | 46    | 23   | 205  | 502   | 426  | -0.14  |
| 62           |          | 90   | 37   | 148   | 142   | 73    | 25   | 177  | 565   | 411  | -0.44  |
| 63           |          | 90   | 24   | 191   | 158   | 59    | 22   | 215  | 645   | 367  | -0.83  |
| 64           |          | 90   | 71   | 172   | 123   | 56    | 25   | 213  | 589   | 398  | -0.67  |
| 65           |          | 90   | 60   | 169   | 122   | 54    | 21   | 207  | 573   | 374  | -0.53  |
| 66           |          | 90   | 26   | 162   | 138   | 48    | 21   | 180  | 548   | 388  | -0.28  |
| 67           |          | 100  | 17   | 121   | 121   | 51    | 24   | 143  | 459   | 386  | -0.46  |
| 68           |          | 100  | 17   | 135   | 135   | 58    | 31   | 224  | 582   | 427  | -0.89  |
| 69           |          | 100  | 17   | 146   | 146   | 46    | 19   | 224  | 582   | 349  | -0.96  |
| 70           |          | 100  | 24   | 204   | 186   | 77    | 30   | 166  | 662   | 431  | -0.47  |
| 71           |          | 100  | 22   | 221   | 196   | 72    | 24   | 211  | 724   | 465  | -0.36  |
| 72           |          | 100  | 25   | 229   | 171   | 73    | 24   | 246  | 743   | 470  | -0.27  |

|              |      |      |      |      |      |     |      |      |      |        |
|--------------|------|------|------|------|------|-----|------|------|------|--------|
| <b>73</b>    | 100  | 22   | 165  | 156  | 71   | 28  | 237  | 657  | 389  | -0.78  |
| <b>74</b>    | 100  | 66   | 156  | 122  | 53   | 33  | 219  | 584  | 413  | -0.54  |
|              | 46   | 32   | 161  | 143  | 59   | 27  | 200  | 589  | 395  | -0.47  |
| <b>ALL F</b> | (67) | (18) | (32) | (27) | (12) | (6) | (33) | (93) | (43) | (0.22) |
|              | 33   | 31   | 165  | 146  | 61   | 28  | 201  | 601  | 418  | -0.49  |
| <b>ALL</b>   | (72) | (16) | (33) | (25) | (11) | (8) | (33) | (92) | (49) | (0.22) |

Handedness was assessed using the Edinburgh questionnaire (Oldfield, 1971). In each male/female group, data was sorted according to handedness. See text for anatomical measurements. Legend: CC: midsagittal surface area of the whole Corpus Callosum, F: females, FLI: hemispheric Functional Lateralization Index based on Nagata's method (see text), Hol, II, III, IV and V: midsagittal surface area of the different portions of the CC according to Hofer et al, 2006 (see text), M: males, SD: standard deviation, WM: whole white matter hemispheric volumes.

**Table B: Anatomical results**

a. MULTIPLE REGRESSIONS

|            |                   | Dependent variable |         |          |           |          |         |
|------------|-------------------|--------------------|---------|----------|-----------|----------|---------|
|            |                   | CC                 | Hofer I | Hofer II | Hofer III | Hofer IV | Hofer V |
|            | $R^2$             | 0.26***            | 0.20**  | 0.27***  | 0.17**    | 0.18**   | 0.12*   |
| Regressors | Edinburgh $\beta$ | -0.18              | -0.18   | -0.21*   | -0.02     | -0.13    | -0.11   |
|            | Gender            | 0.18               | 0.15    | 0.15     | 0.15      | -0.01    | 0.19    |
|            | Age               | 0                  | 0.07    | -0.20*   | -0.07     | -0.14    | 0.15    |
|            | WM                | 0.56***            | 0.48*** | 0.51***  | 0.51***   | 0.41**   | 0.41**  |

b. PARTIAL CORRELATIONS

|           | Hofer I | Hofer II | Hofer III | Hofer IV | Hofer V |
|-----------|---------|----------|-----------|----------|---------|
| Hofer I   |         | 0.81***  | 0.52***   | 0.15     | 0.52*** |
| Hofer II  |         |          | 0.65***   | 0.32**   | 0.47*** |
| Hofer III |         |          |           | 0.37***  | 0.36**  |
| Hofer IV  |         |          |           |          | 0.14    |
| Hofer V   |         |          |           |          |         |

a. results of multiple regressions using the Edinburgh handedness score, gender, age and hemispheric white matter volume (WM) as regressors on the surface area of either the whole CC, Hofer I, II, III, IV or V as the dependent variable. b. partial correlations between different subdivisions of the CC according to Hofer's scheme (Hofer and Frahm, 2006) and controlling for whole white matter volume. \*:  $p \leq 0.05$ , \*\*:  $p < 0.01$ , \*\*\*:  $p < 0.001$ .

## SUPPLEMENTARY MATERIAL FIGURE LEGEND

### Figure A. Plot of CC size Vs whole white matter volume.

Plot showing that the whole hemispheric white matter volume explains a significant part of the variance associated with the midsagittal surface area of the corpus callosum. The  $R^2$  and p values are from the simple regression between these two variables.

## SUPPLEMENTARY MATERIAL FIGURE

### Figure A. Plot of CC size Vs whole white matter volume.

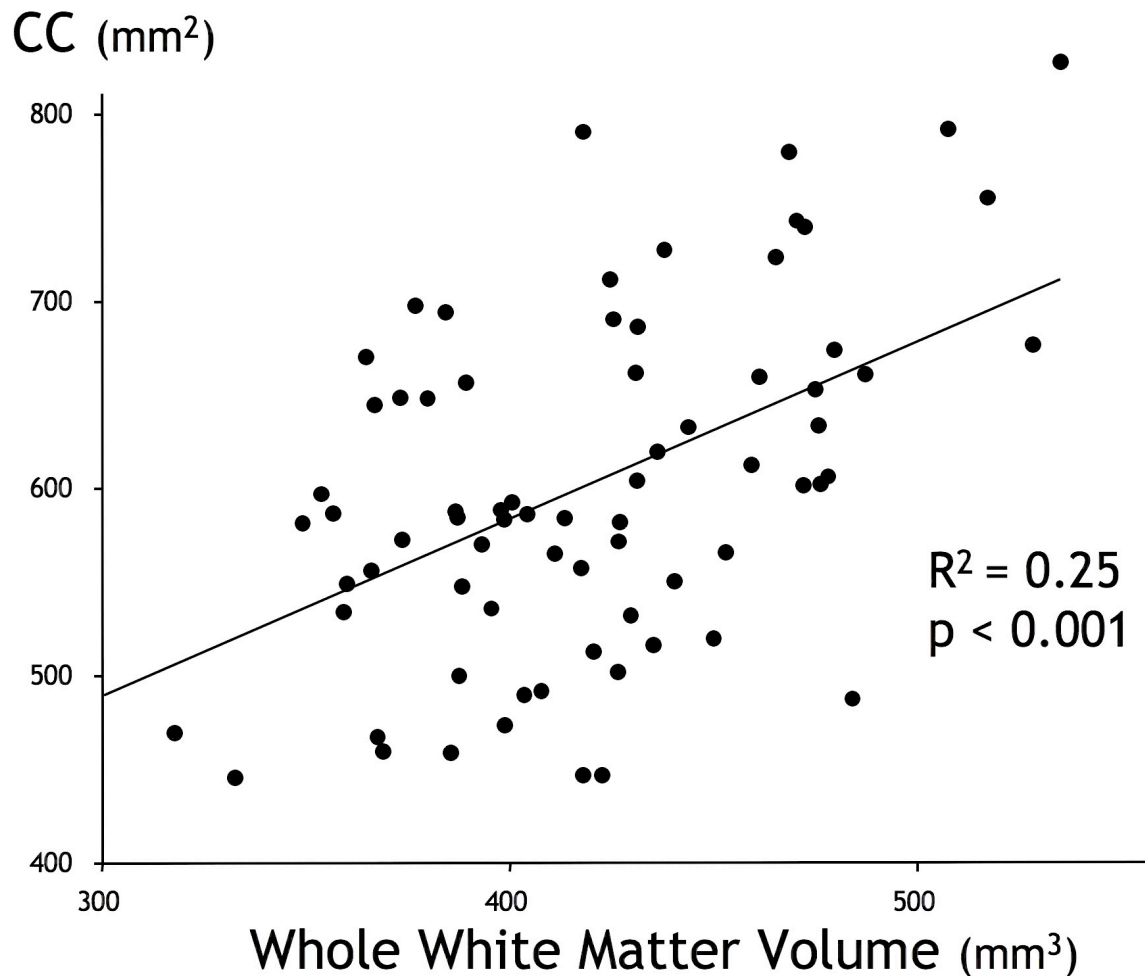

### Figure A. Plot of CC size Vs whole white matter volume.

Plot showing that the whole hemispheric white matter volume explains a significant part of the variance associated with the midsagittal surface area of the corpus callosum. The  $R^2$  and p values are from the simple regression between these two variables.
